# Supplementary material for: Clostridium difficile Cell Wall Protein CwpV Undergoes Enzyme-independent Intramolecular Autoproteolysis
Source: PubMed Central journal article supplement — J Biol Chem. 2011 Nov 28;287(2):1538–44. doi: 10.1074/jbc.M111.302463 (PMC3256870; doi:10.1074/jbc.m111.302463), 2011-11-28
Supplement: supp_M111.302463_jbc.M111.302463-1.pdf [file supp_M111.302463_jbc.M111.302463-1.pdf]

**Figure S1.**

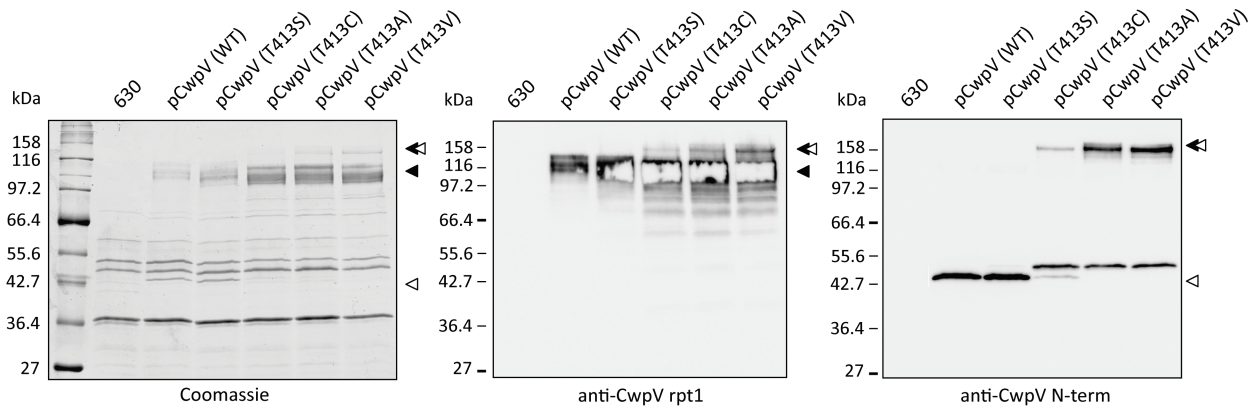

**Fig. S1.** *C. difficile* culture supernatants from *cwpV* mutants. Supernatants from overnight cultures of *C. difficile* 630 [630],  $\Delta cwpV$  (pCwpV) [pCwpV (WT)],  $\Delta cwpV$  (pCwpV<sub>T413S</sub>) [pCwpV (T413S)],  $\Delta cwpV$  (pCwpV<sub>T413C</sub>) [pCwpV (T413C)],  $\Delta cwpV$  (pCwpV<sub>T413A</sub>) [pCwpV (T413A)] and  $\Delta cwpV$  (pCwpV<sub>T413V</sub>) [pCwpV (T413V)] were concentrated using a Microcon spin column (MWCO 3 kDa) (Millipore), separated on 10% SDS-PAGE gels and analysed via coomassie staining and Western blotting. Significant amount of degraded repeat domain (~116 kDa) was detected in supernatants from all mutant strain, most likely as a result of disruption of interaction domains between the two CwpV fragments. In addition, the ~158 kDa precursor could be seen in supernatants from  $\Delta cwpV$  (pCwpV<sub>T413C</sub>),  $\Delta cwpV$  (pCwpV<sub>T413A</sub>) and  $\Delta cwpV$  (pCwpV<sub>T413V</sub>) indicating that the full-length protein is not incorporated into the S-layer as efficiently as its processed variant. A slightly larger variant of the ~42 kDa anchoring domain could also be observed in those strains, most likely a result of proteolytic degradation of the precursor protein. ◀, repeat domain; ◁, anchoring domain.
