# Supplementary material for: Clostridium difficile Cell Wall Protein CwpV Undergoes Enzyme-independent Intramolecular Autoproteolysis
Source: PubMed Central journal article supplement — J Biol Chem. 2011 Nov 28;287(2):1538–44. doi: 10.1074/jbc.M111.302463 (PMC3256870; doi:10.1074/jbc.m111.302463), 2011-11-28
Supplement: supp_M111.302463_jbc.M111.302463-2.pdf [file supp_M111.302463_jbc.M111.302463-2.pdf]

**Table S1. Plasmids used in this study**

| Plasmid number | Plasmid name                    | Descriptive name                            | Source        | Description                                                                                 |
|----------------|---------------------------------|---------------------------------------------|---------------|---------------------------------------------------------------------------------------------|
| pMTL960        |                                 |                                             | Nigel Minton  | <i>E. coli</i> – <i>C. difficile</i> shuttle vector                                         |
| pET28a         |                                 |                                             | Novagen       | <i>E. coli</i> expression vector                                                            |
| pCBR080        | pCwpV                           | pMTL960-Pcwp2-cwpV-streptag                 | Cate Reynolds | pMTL960 plasmid containing the full, strep-tagged copy of CwpV from <i>C. difficile</i> 630 |
| pMLD001        | pCwpV <sub>T413A</sub>          | pMTL960-Pcwp2-cwpV-streptag-T413A           | This study    | pCBR080 with T413A mutation                                                                 |
| pMLD002        | pCwpV <sub>T413V</sub>          | pMTL960-Pcwp2-cwpV-streptag-T413V           | This study    | pCBR080 with T413V mutation                                                                 |
| pMLD003        | pCwpV <sub>T413S</sub>          | pMTL960-Pcwp2-cwpV-streptag-T413S           | This study    | pCBR080 with T413S mutation                                                                 |
| pMLD004        | pCwpV <sub>T413C</sub>          | pMTL960-Pcwp2-cwpV-streptag-T413C           | This study    | pCBR080 with T413C mutation                                                                 |
| pMLD006        | pCwpV <sub>K410G; D411G</sub>   | pMTL960-Pcwp2-cwpV-streptag-K410G; D411G    | This study    | pCBR080 with K410G; D411G mutations                                                         |
| pMLD008        | pCwpV <sub>fr</sub>             | pET28a-cwpV aa 28-611-streptag              | This study    | pET28a plasmid containing a strep-tagged CwpV fragment (aa 28-611)                          |
| pMLD009        | pCwpV <sub>frT413A</sub>        | pET28a-cwpV aa 28-611-streptag-T413A        | This study    | T413A mutation in pMLD008                                                                   |
| pMLD010        | pCwpV <sub>frK410G; D411G</sub> | pET28a-cwpV aa 28-611-streptag-K410G; D411G | This study    | K410G; D411G mutations in pMLD008                                                           |
