# Supplementary material for: Clostridium difficile Cell Wall Protein CwpV Undergoes Enzyme-independent Intramolecular Autoproteolysis
Source: PubMed Central journal article supplement — J Biol Chem. 2011 Nov 28;287(2):1538–44. doi: 10.1074/jbc.M111.302463 (PMC3256870; doi:10.1074/jbc.m111.302463), 2011-11-28
Supplement: supp_M111.302463_jbc.M111.302463-3.pdf [file supp_M111.302463_jbc.M111.302463-3.pdf]

**Table S2. Primers used in this study**

| <b>Name</b>   | <b>Orientation</b> | <b>Sequence (5' to 3')</b>                              | <b>Description</b>                                                      |
|---------------|--------------------|---------------------------------------------------------|-------------------------------------------------------------------------|
| <b>NF1558</b> | Forward            | GCTTTTGTAACTATGGAAAAA<br>TAACTAACTTAAAGG                | T413A mutation in CwpV cleavage site by inverse PCR                     |
| <b>NF1559</b> | Forward            | TGTTTTGTAACTATGGAAAAA<br>TAACTAACTTAAAGG                | T413V mutation in CwpV cleavage site by inverse PCR                     |
| <b>NF1560</b> | Forward            | AGTTTTGTAACTATGGAAAAA<br>TAACTAACTTAAAGG                | T413S mutation in CwpV cleavage site by inverse PCR                     |
| <b>NF1561</b> | Forward            | GTTTTTGTAACTATGGAAAAA<br>TAACTAACTTAAAGG                | T413C mutation in CwpV cleavage site by inverse PCR                     |
| <b>NF1562</b> | Reverse            | TCCATCTTTTACATCATCTATAA<br>CTACATC                      | Mutation in CwpV cleavage site by inverse PCR. Universal reverse primer |
| <b>NF1599</b> | Forward            | CCATGGGACAAACTGTGGC                                     | Amplification of CwpV fragment (aa 28-626) for pET28a cloning           |
| <b>NF1600</b> | Reverse            | CTCGAGTGAATCTGTAGCTCC                                   | Amplification of CwpV fragment (aa 28-626) for pET28a cloning           |
| <b>NF1605</b> | Forward            | GGAGGAGGAACTTTTGTAACT<br>ATGGAAAAATAACTAACTAAA<br>GG    | K411Gly; D412G mutation in CwpV cleavage site by inverse PCR            |
| <b>NF1606</b> | Reverse            | TACATCATCTATAACTACATCA<br>TCCACTTTTGCATAGTTATTAC<br>ATC | K411G; D412G mutation in CwpV cleavage site by inverse PCR              |
| <b>NF1622</b> | Forward            | CAATTTGAAAAATGAGATCCGG<br>CTGCTAACAAAG                  | <i>Strep</i> -tagging a CwpV fragment (aa 28-611)                       |
| <b>NF1623</b> | Reverse            | TGGATGACTCCACACACTTACA<br>TTATTTAAATCATTTTGTATT         | <i>Strep</i> -tagging a CwpV fragment (aa 28-611)                       |
